# Supplementary material for: 3D printed rGO/CNT microlattice aerogel for a dendrite-free sodium metal anode
Source: Royal Society of Chemistry journal article supplement (doi:10.1039/d0ta05817c), 2020-01-01
Supplement: d0ta05817c1.pdf [file d0ta05817c1.pdf]

## Supporting Information

### **3D Printed rGO/CNT Microlattice Aerogel for Dendrite-free Na Metal Anode**

Jin Yan,<sup>a</sup> Gang Zhi,<sup>a</sup> Dezhi Kong,<sup>a</sup> Hui Wang,<sup>b</sup> Tingting Xu,<sup>a</sup> Jinhao Zang,<sup>a</sup> Weixia Shen,<sup>a</sup>  
Junmin Xu,<sup>a</sup> Yumeng Shi,<sup>c</sup> Shuge Dai,<sup>a</sup> Xinjian Li,<sup>a</sup> Ye Wang<sup>a,\*</sup>

a. Key Laboratory of Material Physics, Ministry of Education, School of Physics and Microelectronics, Zhengzhou University, Zhengzhou 450052, P. R. China

b. Center of Super-Diamond and Advanced Films (COSDAF) and Department of Chemistry, City University of Hong Kong, Hong Kong SAR, 999077, P. R. China

c. International Collaborative Laboratory of 2D Materials for Optoelectronics Science and Technology of Ministry of Education, Engineering Technology Research Center for 2D Material Information Function Devices and Systems of Guangdong Province, Institute of Microscale Optoelectronics, Shenzhen University, Shenzhen, 518060, P. R. China

\*Corresponding author.

Email address: wangye@zzu.edu.cn.

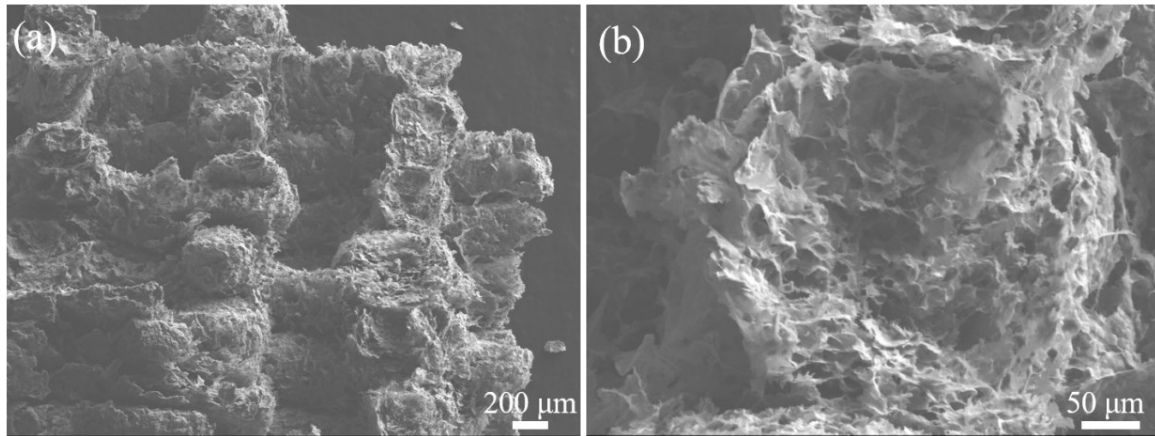

**Fig. S1.** SEM images of cross section of the 3D printed rGO/CNT microlattice aerogel with (a) low and (b) high magnifications.

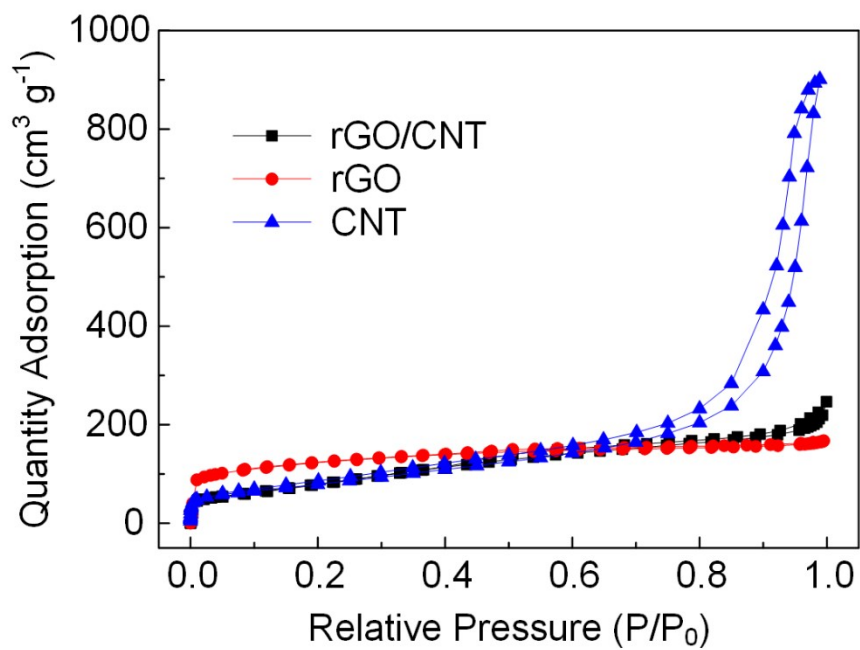

**Fig. S2.** Nitrogen adsorption–desorption isotherms at 77 K to measure the surface area of CNT, rGO and rGO/CNT nanocomposites.

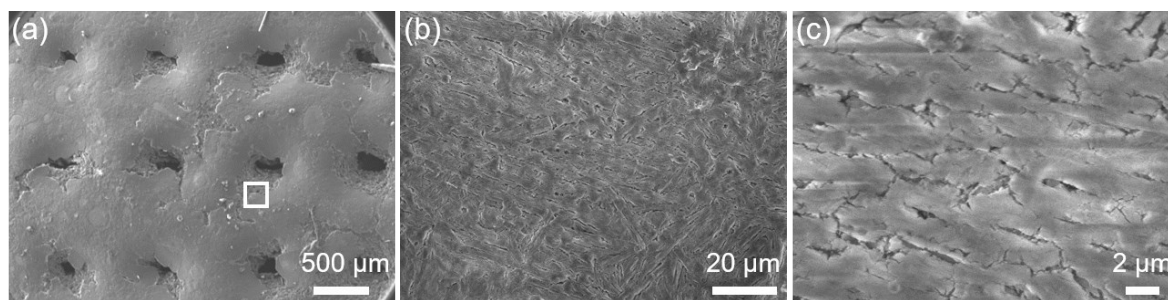

**Fig. S3.** SEM images with (a) low, (b) middle and (c) high magnifications of 3D Na@rGO/CNT electrode after deposited with a capacity of  $5 \text{ mAh cm}^{-2}$  at  $0.5 \text{ mA cm}^{-2}$

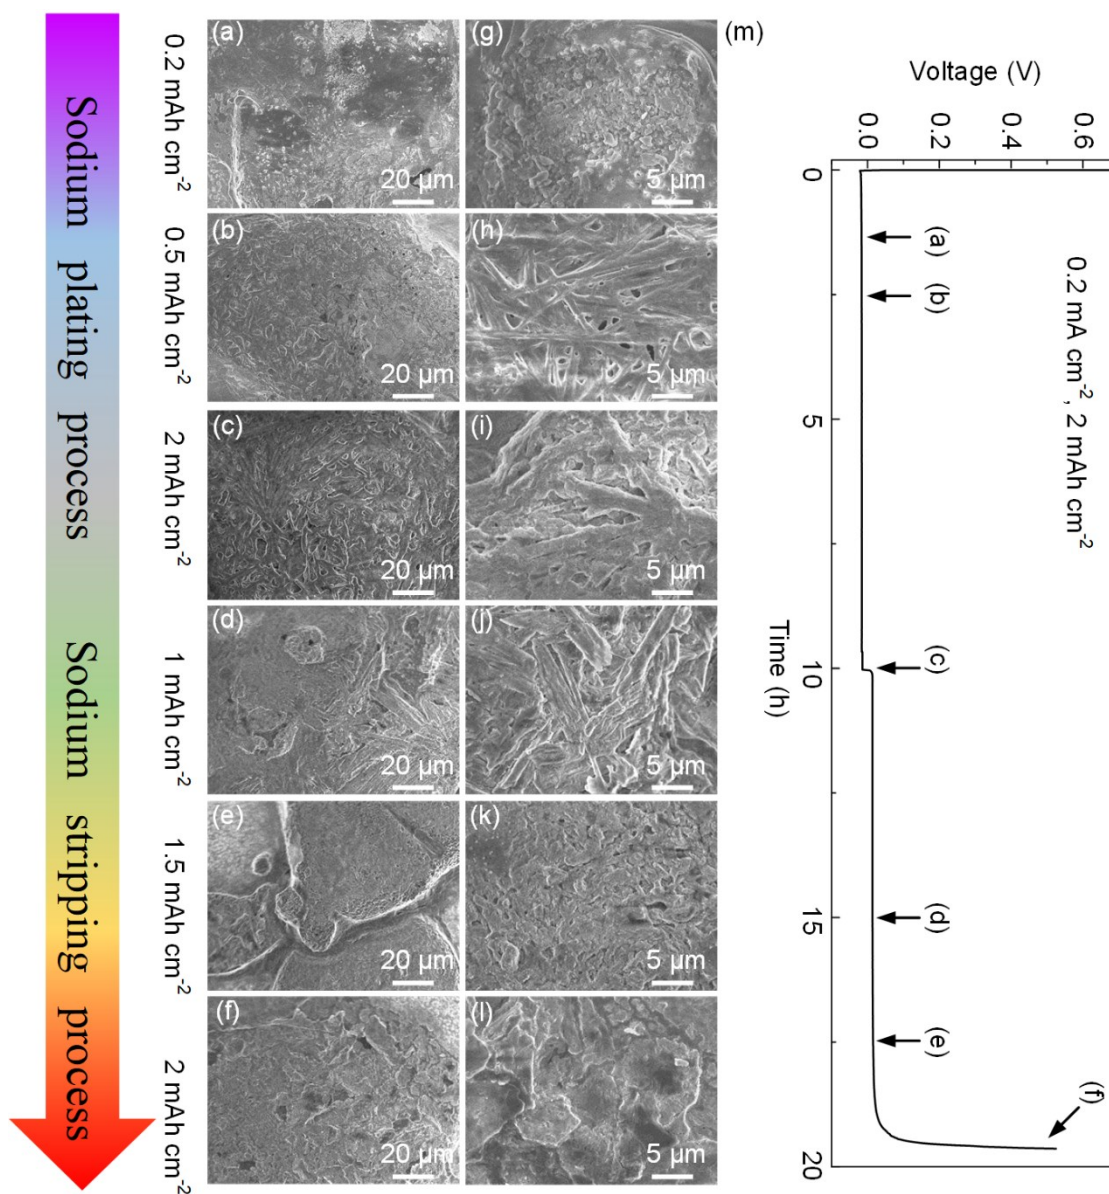

**Fig. S4.** Morphological evolution of Na metal plating and stripping on planar Cu. SEM images of planar Cu electrode after plated at a capacity of (a, g)  $0.2 \text{ mAh cm}^{-2}$  (b, h)  $0.5 \text{ mAh cm}^{-2}$  and (c, i)  $2 \text{ mAh cm}^{-2}$ , and then stripped (d, j)  $1 \text{ mAh cm}^{-2}$ , (e, k)  $1.5 \text{ mAh cm}^{-2}$  and (f, l)  $2 \text{ mAh cm}^{-2}$  at a current density of  $0.2 \text{ mA cm}^{-2}$ . (m) The corresponding plating/stripping curve at a current density of  $0.2 \text{ mA cm}^{-2}$  with a capacity of  $2 \text{ mAh cm}^{-2}$ .

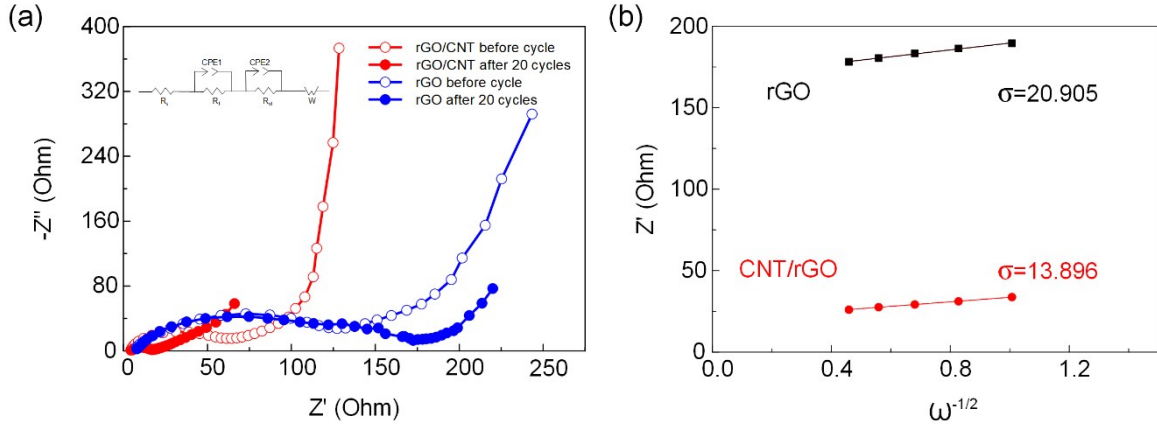

**Fig. S5.** (a) EIS spectra and corresponding fittings of the rGO/CNT and rGO sodium metal hosts before cycle and after 20<sup>th</sup> cycle. Inset is the equivalent circuit.  $R_s$ ,  $R_f$ ,  $R_{ct}$ , CPE and W are the current collector and electrolyte resistance, SEI layer resistance, charge transfer resistance, constant phase element-related double-layered capacitor and Warburg impedance related to the sodium ion diffusion, respectively. (b) Relationship between  $Z'$  and  $\omega^{-1/2}$  in the low-frequency region of EIS (after 20 cycles) to fit the Warburg factor  $\sigma$  from EIS curves to calculate the diffusion coefficient.

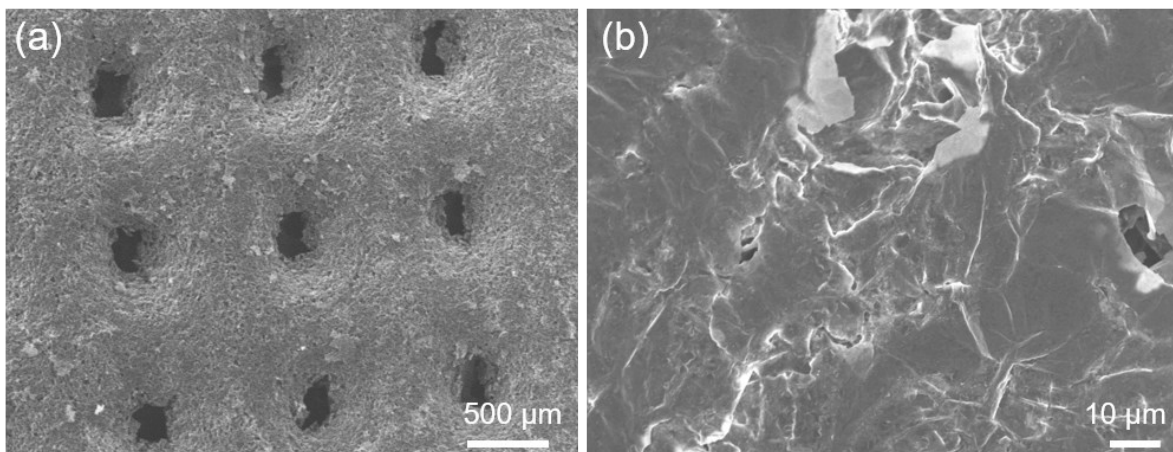

**Fig. S6.** The SEM images with (a) low and (b) high magnifications of the 3D Na@rGO/CNT microlattice electrode after 50 cycles at a current density of  $2 \text{ mA cm}^{-2}$  with a capacity limitation of  $1 \text{ mAh cm}^{-2}$ .
